# Supplementary material for: Prescribing practice of pregabalin/gabapentin in pain therapy: an evaluation of German claim data
Source: PubMed Central journal article supplement — BMJ Open. 2019 Mar 30;9(3):e021535. doi: 10.1136/bmjopen-2018-021535 (PMC6475154; doi:10.1136/bmjopen-2018-021535), 2019-03-30
Supplement: bmjopen-2018-021535supp001.pdf [file bmjopen-2018-021535supp001.pdf]

## The classification criteria of the pain-related diagnosis

### ICD-10 pain code “not neuropathic”

|       |                                                                                                                |
|-------|----------------------------------------------------------------------------------------------------------------|
| F413  | fear/tension- type pain syndrome                                                                               |
| F4534 | psychogenic painful micturition                                                                                |
| F4539 | psychogenic pain of the abdomen                                                                                |
| F4540 | continuing somatoform disorder                                                                                 |
| F4541 | chronic pain with somatic and psychological factors                                                            |
| G440  | cluster headache                                                                                               |
| G441  | vasomotor headache                                                                                             |
| G442  | tension headache                                                                                               |
| G443  | chronic posttraumatic headache                                                                                 |
| G444  | headache caused by drugs                                                                                       |
| G448  | other headache without detailed specification                                                                  |
| G501  | atypical facial pain                                                                                           |
| H571  | eye pain                                                                                                       |
| I702  | arteriosclerosis of the extremities: physical stress induced leg pain                                          |
| L905  | cicatix pain                                                                                                   |
| M2550 | joint pain: multiple sites                                                                                     |
| M2551 | joint pain: shoulder region (clavícula, scapula, acromioclavicular-/shoulder-/sternoclavicular joints)         |
| M2552 | joint pain: upper arm (humerus, elbow joint)                                                                   |
| M2553 | joint pain: forearm (radius, ulna, wrist)                                                                      |
| M2554 | joint pain: hand (finger, carpus, metacarpus)                                                                  |
| M2555 | joint pain: pelvic region and thigh (pelvis, femur, buttocks, hip, hip joint, sacroiliac joint)                |
| M2556 | joint pain: lower leg (fibula, tibia, knee joint)                                                              |
| M2557 | joint pain: ankle and foot (tarsal, metatarsal, toes, ankle, subtalar joint, other ankle joints)               |
| M2558 | joint pain: multiple sites (neck, head, ribs, torso, spine)                                                    |
| M2559 | joint pain: multiple localisation                                                                              |
| M545  | back pain                                                                                                      |
| M546  | pain in area of thoracic spine                                                                                 |
| M5480 | other back pain: different areas of the spine                                                                  |
| M5481 | other back pain: atlanto-occipital joint                                                                       |
| M5482 | other back pain: cervical area                                                                                 |
| M5483 | other back pain: cervical-thoracic area                                                                        |
| M5484 | other back pain: thoracic area                                                                                 |
| M5485 | other back pain: thoracic-lumbar area                                                                          |
| M5486 | other back pain: lumbar area                                                                                   |
| M5487 | other back pain: lumbar-sacral area                                                                            |
| M5488 | other back pain: sacral area                                                                                   |
| M5489 | other back pain: not detailed localisation                                                                     |
| M5490 | back pain- nondetailed specification: several localisations of the spine                                       |
| M5491 | back pain- no detailed specification: atlanto-occipital joint                                                  |
| M5492 | back pain- no detailed specification: cervical area                                                            |
| M5493 | back pain- no detailed specification: cervical-thoracic area                                                   |
| M5494 | back pain- no detailed specification: thoracic area                                                            |
| M5495 | back pain- no detailed specification: thoracic-lumbar area                                                     |
| M5496 | back pain- no detailed specification: lumbar area                                                              |
| M5497 | back pain- no detailed specification: lumbar-sacral area                                                       |
| M5498 | ankle and foot (tarsal, metatarsal, toes, ankle, subtalar joint, other ankle joints)                           |
| M5499 | back pain- not detailed specification: area not detailed localisation                                          |
| M7960 | pain in extremities: several localisations                                                                     |
| M7961 | pain in extremities: shoulder region (clavícula, scapula, acromioclavicular-/shoulder-/sternoclavicular joint) |
| M7962 | pain in extremities: upper arm (humerus, elbow joint)                                                          |
| M7963 | pain in extremities: forearm (radius, ulna, wrist)                                                             |
| M7964 | pain in extremities: hand (finger, carpus, metacarpus)                                                         |
| M7965 | pain in extremities: pelvic region and thigh (pelvis, femur, buttocks, hip, hip joint, sacroiliac joint)       |
| M7966 | pain in extremities: lower leg (fibula, tibia, knee joint)                                                     |
| M7967 | pain in extremities: ankle and foot (tarsal, metatarsal, toes, ankle, subtalar joint, other ankle joints)      |
| M7969 | pain in extremities: no detailed localisation                                                                  |
| M961  | post dissection syndrome                                                                                       |
| N3981 | flank pain                                                                                                     |
| N940  | intermenstrual pain                                                                                            |
| O294  | headache after spinal cord anesthesia during pregnancy                                                         |
| O745  | headache after spinal cord anesthesia during pregnancy                                                         |
| O894  | headache after spinal cord anesthesia during childbirth                                                        |
| R070  | sore throat                                                                                                    |

|      |                                                    |
|------|----------------------------------------------------|
| R071 | chest pain while breathing                         |
| R072 | precordial pain                                    |
| R073 | other kind of chest pain                           |
| R074 | chest pain: no detailed specification              |
| R101 | pain in the area of upper abdomen                  |
| R102 | pain in the area of pelvis and perineum            |
| R103 | pain in other areas of lower abdomen               |
| R104 | other pains without detailed specification         |
| R309 | pains passing water without detailed specification |
| R51  | headache                                           |
| R520 | acute pain                                         |
| R521 | chronic unswayable pain                            |
| R522 | other chronic pain                                 |
| R529 | pain without detailed specification                |

**ICD-10 pain codes “typically neuropathic”**  
(Diagnoses with an improved evidence via controlled randomised studies)

|       |                                                    |
|-------|----------------------------------------------------|
| B02   | herpes zoster                                      |
| G500  | trigeminal neuralgia                               |
| G530  | post zoster neuralgia                              |
| G546  | phantom pain                                       |
| G9585 | deafferentation pain due to spinal cord impairment |
| M797  | fibromyalgia                                       |
| T926  | stump pain after traumatically arm amputation      |
| T936  | stump pain after traumatically leg amputation      |

**ICD-10 pain code “possibly neuropathic”**  
(diseases with a potentially neuropathic genesis based upon aetiology/anatomical deliberations, independent from the therapeutic benefit of P/G according to the guideline “diagnostic for neuropathic pain” from the German Society of Neurology [1])

|      |                                                                 |
|------|-----------------------------------------------------------------|
| G130 | paraneoplastic neuromyopathy and neuropathy                     |
| G521 | diseases of N. glossopharyngeus and glossopharyngeus neuralgia  |
| G56  | mono neuropathy of the upper extremity                          |
| G57  | mono neuropathy of the lower extremity                          |
| G58  | other mono neuropathies                                         |
| G59  | mono neuropathy parallel to other illness                       |
| G60  | hereditary and idiopathic neuropathy                            |
| G61  | polyneuritis                                                    |
| G62  | other polyneuropathies                                          |
| G63  | polyneuropathy parallel to other illness                        |
| G990 | autonomous neuropathy through endokrinal and metabolic diseases |
| M501 | cervical intervertebral disc degeneration with radiculopathy    |
| M511 | lumbal intervertebral disc degeneration with radiculopathy      |
| M541 | radiculopathy                                                   |
| M542 | cervical neuralgia                                              |
| M543 | ischialgia                                                      |
| M544 | lumboischialgia                                                 |

1 Deutsche Gesellschaft für Neurologie. Diagnostik neuropathischer Schmerzen: S1-Leitlinie 2012.
